# Supplementary material for: Small Molecule Inhibitors of Plasminogen Activator Inhibitor-1 Elicit Anti-Tumorigenic and Anti-Angiogenic Activity
Source: PubMed Central journal article supplement (PMC4514594; doi:10.1371/journal.pone.0133786), 2015-07-24
Supplement: pone.0133786.s009.pdf [file pone.0133786.s009.pdf]

| <b>Cell Line</b> | <b>Cell Type</b>                              | <b>TM5275 IC<sub>50</sub><br/>(<math>\mu</math>M)</b> | <b>TM5441 IC<sub>50</sub><br/>(<math>\mu</math>M)</b> | <b>PAI-1 level<br/>(ng/ mg)</b> |
|------------------|-----------------------------------------------|-------------------------------------------------------|-------------------------------------------------------|---------------------------------|
| HT1080           | Fibrosarcoma                                  | 21.7                                                  | 13.9                                                  | 692                             |
| HCT 116          | Colorectal Carcinoma                          | 37.4                                                  | 27.3                                                  | 26.9                            |
| Daoy             | Desmoplastic Cerebellar Medulloblastoma       | 9.70                                                  | 29.1                                                  | 494                             |
| MDA-MB-231       | Breast Adenocarcinoma                         | 60.3                                                  | 47.0                                                  | 729                             |
| Jurkat           | T Lymphocytes from Acute Lymphocytic Leukemia | 25.3                                                  | 51.1                                                  | 19.9                            |
